# Supplementary material
Source: PubMed Central journal article supplement (PMC6413285)
Supplement: ajtr0011-0911-f6.pdf [file ajtr0011-0911-f6.pdf]

Phasic change and apoptosis regulation of JAK2/STAT3 pathway in DCM

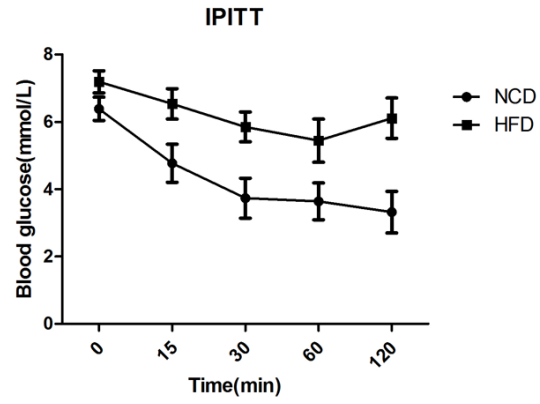

**Figure S1.** Insulin resistance after a 4-week period of HF diet. IPITT, intraperitoneal insulin tolerance test.
